# Supplementary material for: RNA Sequencing and Coexpression Analysis Reveal Key Genes Involved in α-Linolenic Acid Biosynthesis in Perilla frutescens Seed
Source: MDPI journal article supplement (doi:10.3390/ijms18112433), 2017-11-16
Supplement: s1 [file s1]

**Figure S1.** The COG annotation for all assembled unigenes. Of 8654 unigenes were classified into 25 COG categories.

**Figure S2.** Gene ontology classification of the perilla transcriptome. Gene ontology (GO) terms summarized into three main GO categories (biological process, cellular component, and molecular function).

**Figure S3.** Functional classification and pathway assignment of assembled unigenes by KEGG.

**Figure S4.** Correlations of expression levels by real time PCR (log2qPCR, *x* axis) with data obtained using the log2 RNA-Seq platform (*y*-axis) for different genes and time points. One point represents a sample, and seven genes are analyzed through qRT-PCR. The name of TF has been marked in legend.

**Figure S5.** Relative expression of selected unigenes in developing seeds.

**Table S1.** Number of lipid metabolism gene

**Table S2.** Enzymes/protein related to FA biosynthesis and metabolism identified by annotation of the Perilla unigenes

**Table S3.** List of co-expressed transcript factor gene.

**Table S4.** The Pearson correlation analysis between FAD3 and target genes.
